# Supplementary material for: Designing rare earth-free high entropy oxides with a tungsten bronze structure for thermoelectric applications
Source: Royal Society of Chemistry journal article supplement (doi:10.1039/d2mh01488b), 2023-01-01
Supplement: d2mh01488b1.pdf [file d2mh01488b1.pdf]

## **Supporting Information**

### **Designing Rare Earth Free High Entropy Oxide with Tungsten Bronze Structure for Thermoelectric Application**

*Subhra Sourav Jana and Tanmoy Maiti\**

*Plasmonics and Perovskites Laboratory, Department of Materials Science and Engineering,  
IIT Kanpur, U.P. 208016, India.*

#### **Experimental methods:**

$(SrBaLiKNa)_{0.2}Nb_2O_6$  has been synthesized through solid state processing technique using stoichiometric ratio of  $SrCO_3$  (Sigma-Aldrich),  $BaCO_3$  (Sigma-Aldrich),  $Li_2CO_3$  (Sigma-Aldrich),  $Na_2CO_3$  (Sigma-Aldrich),  $K_2CO_3$  (Sigma-Aldrich) and  $Nb_2O_5$  (Sigma-Aldrich). All the precursor raw materials have been mixed properly in alcohol medium using  $ZrO_2$  balls as grinding media. The powder mixture is calcined at 1423K for 8 hours in reducing atmosphere. The calcined powder is vigorously ground and the final powder is pressed into 15mm diameter pellets under application of 8 tons of load. The green pellets are finally sintered in 1473K for 10 hours in reducing atmosphere.

---

\* Corresponding author Telephone: +91-512-259-6599; Email address: [tmaiti@iitk.ac.in](mailto:tmaiti@iitk.ac.in)

Crystal structure of the sintered pellet has been determined using Pan analytical XRD with Cu  $K\alpha$  radiation. Microstructure of the fractured sample has been examined using Nova NanoSEM 450 (FESEM) at IIT Kanpur. Further, nanoscale structure has been observed under FEI-Titan G2 60-300 KV TEM (HRTEM, IIT Kanpur). Oxidation states of elements have been identified by X-ray Photoelectron Spectroscopy (PHI 5000 Versa Probe II, FEI Inc., IIT Kanpur). The pellet is machined in the dimension of  $3\text{mm} \times 3\text{mm} \times 12\text{mm}$  for the thermoelectric measurement. Electrical conductivity and Seebeck coefficient have been measured in ZEM-3M10R, ULVAC-RICO Inc. apparatus, IIT Kanpur. Thermal diffusivity and specific heat capacity have been estimated using TC-1200RH and ADVANCE RIKO and HDSC PT 1600 (LINSEIS), respectively.

### Thermodynamic Calculation:

The coefficient required for calculation of enthalpy and entropy change have been estimated by fitting  $C_p$  with the equation (4) in manuscript. The fitted curve for HETB is shown in **fig.S1**.

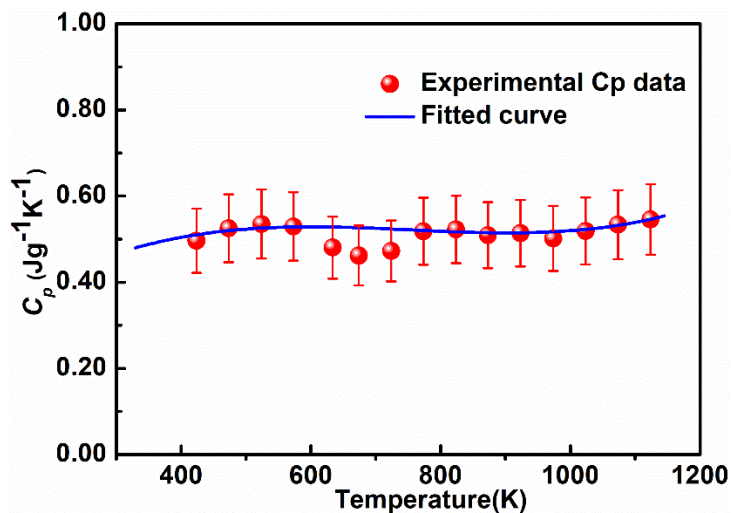

**Fig.S1:** Fitting curve of specific heat ( $C_p$ ) for *HETB*.

**Table S1:** *A, B, C, D, E, F, G* and  $H_f$  of all the precursor oxides including *HETB*.

| Oxides                         | <i>A</i> | <i>B</i> | <i>C</i> | <i>D</i> | <i>E</i> | <i>F</i> | <i>G</i> | $H_f$        |
|--------------------------------|----------|----------|----------|----------|----------|----------|----------|--------------|
| Li <sub>2</sub> O              | 68.69    | 5.46     | 23.18    | 9.49     | -1.60    | -625.03  | 109.39   | 598.73       |
| Na <sub>2</sub> O              | 2240.95  | -        | 1803.69  | -359.07  | -386.24  | -1877.63 | 2421.66  | -417.98      |
| K <sub>2</sub> O               | 72.55    | 41.39    | 0.72     | 0.21     | 0.06     | -386.16  | 170.56   | 363.17       |
| BaO                            | 47.42    | 13.13    | 3.79     | 0.72     | -0.33    | -563.93  | 123.79   | -548.10      |
| SrO                            | 48.55    | 8.74     | 0.89     | 0.11     | -0.50    | -608.63  | 108.74   | -592.03      |
| Nb <sub>2</sub> O <sub>5</sub> | 116      | 117.18   | -71.76   | 15.30    | -1.16    | -1942.64 | 239.33   | -<br>1899.54 |
| <i>HETB</i>                    | 30       | 325      | -446     | 196      | 0.01     | 1463.44  | 220      | -<br>1443.65 |

**Table S2:** Mixing enthalpy of binary alloys

| Binary alloys | $\Delta H_{AB}^{mix}$ |
|---------------|-----------------------|
| Na-Li         | 3.43                  |
| Na-K          | 1.515                 |
| Na-Sr         | -1.756                |
| Na-Ba         | -2.595                |
| Li-K          | 10.892                |
| Li-Sr         | -0.277                |
| Li-Ba         | -0.143                |
| K-Sr          | 7.248                 |
| K-Ba          | 5.93                  |
| Sr-Ba         | 0.042                 |

## Crystal structure analysis:

**Table S3:** Refined parameters of *HETB*

| Elements               | x( $\pm 0.0001$ )                                           | y( $\pm 0.0001$ ) | z( $\pm 0.0001$ ) |
|------------------------|-------------------------------------------------------------|-------------------|-------------------|
| Sr/Ba/Na/K/Li          | 0                                                           | 0                 | 0                 |
| Sr/Ba/Na/K/Li          | 0.17282                                                     | 0.67282           | 0.0031            |
| Sr/Ba/Na/K/Li          | 0.3152                                                      | 0.1558            | 0.9997            |
| Nb1                    | 0.0746                                                      | 0.2114            | 0.4994            |
| Nb2                    | 0.5                                                         | 0                 | 0.502             |
| O1                     | 0.3438                                                      | 0.0055            | 0.4456            |
| O2                     | 0.139                                                       | 0.0682            | 0.4626            |
| O3                     | 0.7195                                                      | 0.2195            | 0.4766            |
| O4                     | 0.0165                                                      | 0.5165            | 0.9857            |
| O5                     | 0.0988                                                      | 0.1928            | 0.0028            |
| O6                     | 0.0542                                                      | 0.217             | 0.0211            |
| Space group            | P4bm                                                        |                   |                   |
| Crystal structure      | Tetragonal                                                  |                   |                   |
| Lattice parameter      | a=b=12.4756Å( $\pm 0.0002$ ),<br>c=3.9568Å ( $\pm 0.0002$ ) |                   |                   |
| Reliability parameters | $R_{exp}=4.6$ , $R_p=4.3$ , $R_{wp}=5.6$ , $\chi = 1.46$    |                   |                   |

## XPS analysis:

**Table S4:** Oxidation states and binding energies of Nb and O, as estimated from the XPS analysis.

| Element | Bond                               | Binding Energy (eV)<br>( $\pm 0.5$ ) | % Area<br>( $\pm 2$ ) |
|---------|------------------------------------|--------------------------------------|-----------------------|
| Nb      | Nb <sup>+4</sup> 3d <sub>5/2</sub> | 206.26                               | 23                    |
|         | Nb <sup>+5</sup> 3d <sub>5/2</sub> | 207.22                               | 42                    |
|         | Nb <sup>+4</sup> 3d <sub>3/2</sub> | 209.15                               | 12                    |
|         | Nb <sup>+5</sup> 3d <sub>3/2</sub> | 209.9                                | 23                    |
| O       | O1s                                | 529.3                                | 77                    |
|         | Oxygen vacancy                     | 531.27                               | 12                    |
|         | Adsorped O                         | 532.07                               | 11                    |

## Thermal transport:

Thermal conductivity is computed using the equation S(2)

$$\text{Thermal conductivity, } \kappa = D\rho C_p \dots \dots \dots (S1)$$

Specific heat ( $C_p$ ) and thermal diffusivity ( $D$ ) of HETB are measured, as shown in fig.S2(a&b).

Lorenz number (fig.S2(c)) has been calculated from Seebeck coefficient to estimate the  $\kappa_e$ .  $\kappa_e$  with temperature of HETB has been presented in fig.S2(d).

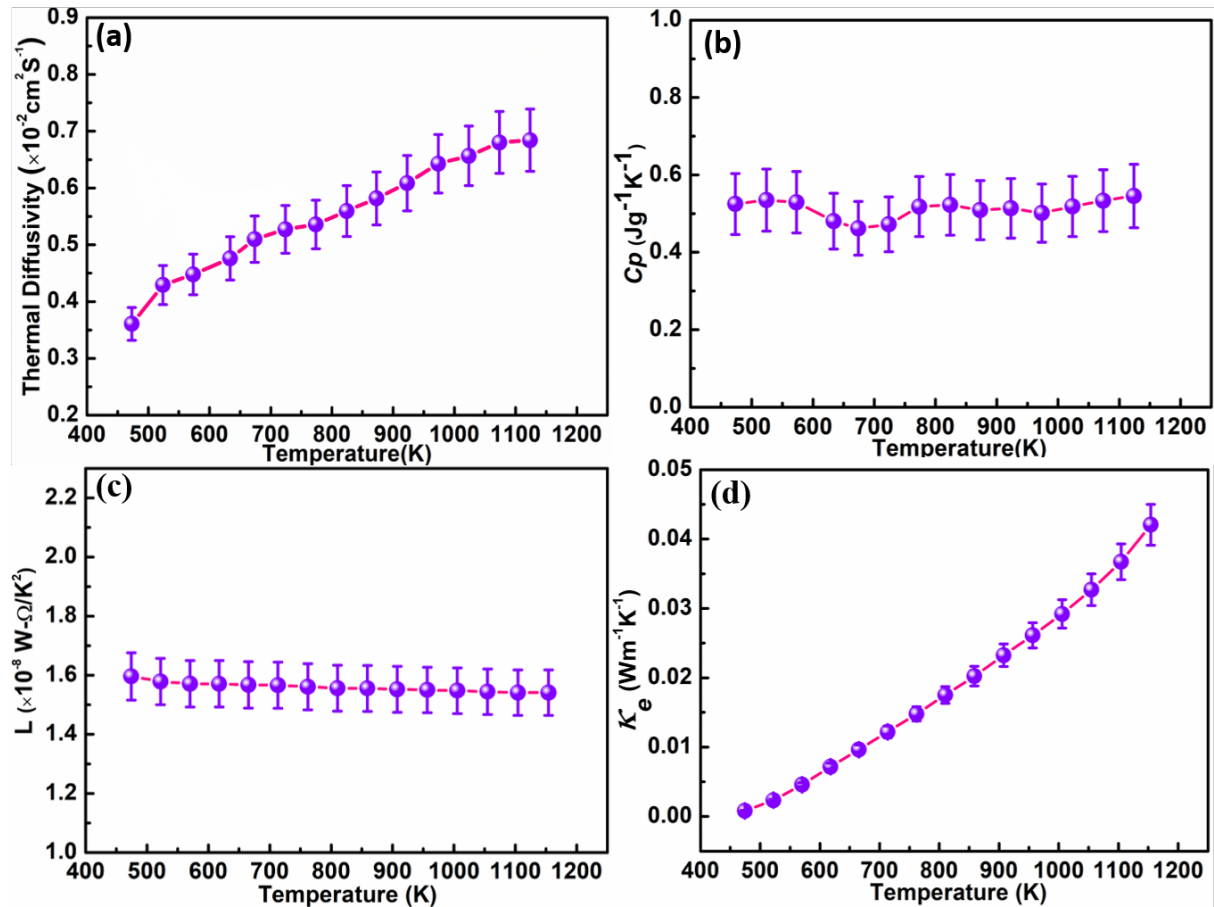

**Fig.S2:** (a) Thermal diffusivity (b) specific heat (c) Lorenz number and (d)  $\kappa_e$  of HETB with temperature

## Determination of mean velocity ( $v_m$ )

Mean velocity ( $v_m$ ) of sound within the material has been estimated using nano hardness measurement (applying a load of 1 mN using a Nano-Indenter). The following four equations are used to compute  $v_m$ .<sup>1</sup>

$$\text{Poisson's ratio, } \nu = \frac{(3B - 2G)}{(6B + 2G)} \dots \dots \dots (S2)$$

$B$  and  $G$  are Bulk modulus Shear modulus, respectively.

$$v_m = \left[ \frac{1}{3} \left( \frac{2}{v_t^3} + \frac{1}{v_l^3} \right) \right]^{-\frac{1}{3}} \dots \dots \dots (S3)$$

Where,  $v_l$  &  $v_t$  are longitudinal and transverse velocity, respectively.

$$v_l = \left( \frac{B + \frac{4}{3}G}{\rho} \right)^{1/2} \dots \dots \dots (S4)$$

$$v_t = \left( \frac{G}{\rho} \right)^{1/2} \dots \dots \dots (S5)$$

Where,  $h$ = Planck's constant,  $\rho$  = density

**Table S5:** The values of Bulk modulus ( $B$ ), Shear modulus ( $G$ ), longitudinal ( $v_l$ ), transverse ( $v_t$ ), mean velocity( $v_m$ ), as calculated for *HETB* system.

| <b>B (Gpa)</b> | <b>G (GPa)</b> | <b>Density (Kg/m<sup>3</sup>)</b> | <b><math>v_l</math> (m/s)</b> | <b><math>v_t</math> (m/s)</b> | <b><math>v_m</math> (m/s)</b> |
|----------------|----------------|-----------------------------------|-------------------------------|-------------------------------|-------------------------------|
| 34 ± 3         | 22 ± 2         | 4700±50                           | 3675 ±180                     | 2171 ± 100                    | 2405 ± 120                    |

**Reference:**

1. Anderson, O.; Schreiber, E.; Soga, N., Elastic Constants and Their Measurements. McGraw-Hill, New York: 1973.
